# Supplementary material for: TRPC4/TRPC5 channels mediate adverse reaction to the cancer cell cytotoxic agent (-)-Englerin A
Source: PubMed Central journal article supplement (PMC6049859; doi:10.18632/oncotarget.25659), 2018-07-03
Supplement: oncotarget-09-29634-s001.pdf [file oncotarget-09-29634-s001.pdf]

## **TRPC4/TRPC5 channels mediate adverse reaction to the cancer cell cytotoxic agent (-)-Englerin A**

### **SUPPLEMENTARY MATERIALS**

**Supplementary Video 1: Video showing effect on wild type C57BL/6 mouse immediately following intraperitoneal injection of (-)-Englerin A 2mg.kg<sup>-1</sup>.**

**See Supplementary Video 1**
